# Supplementary material for: Dialdehyde Cellulose Solution as Reducing Agent: Preparation of Uniform Silver Nanoparticles and In Situ Synthesis of Antibacterial Composite Films with High Barrier Properties
Source: MDPI journal article supplement (doi:10.3390/molecules28072956), 2023-03-26
Supplement: s1 [file s1]

# Dialdehyde Cellulose Solution as Reducing Agent: Preparation of Uniform Silver Nanoparticles and In Situ Synthesis of Antibacterial Composite Films with High Barrier Properties

Jinsong Zeng <sup>1,2</sup>, Xinyi Xiong <sup>1,2</sup>, Fugang Hu <sup>1,2</sup>, Jinpeng Li <sup>1,2</sup> and Pengfei Li <sup>1,2,3,\*</sup>

<sup>1</sup> Plant Fibril Material Science Research Center, State Key Laboratory of Pulp and Paper Engineering, School of Light Industry and Engineering, South China University of Technology, Guangzhou 510640, China

<sup>2</sup> Guangdong Provincial Key Laboratory of Plant Resources Biorefinery, Guangzhou 510006, China

<sup>3</sup> School of Environment and Energy, South China University of Technology, Guangzhou 510640, China

\* Correspondence: felpf@scut.edu.cn; Tel.: +86-18354219786

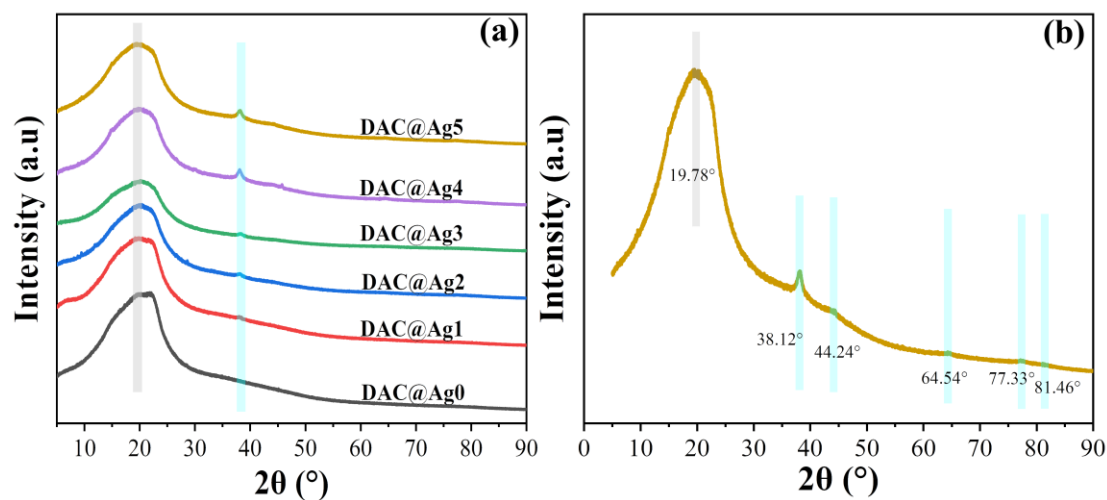

**Figure S1.** (a) XRD spectra of DAC@Ag0-DAC@Ag5 composite films; (b) enlarged view of the spectra of DAC@Ag5 composite film.

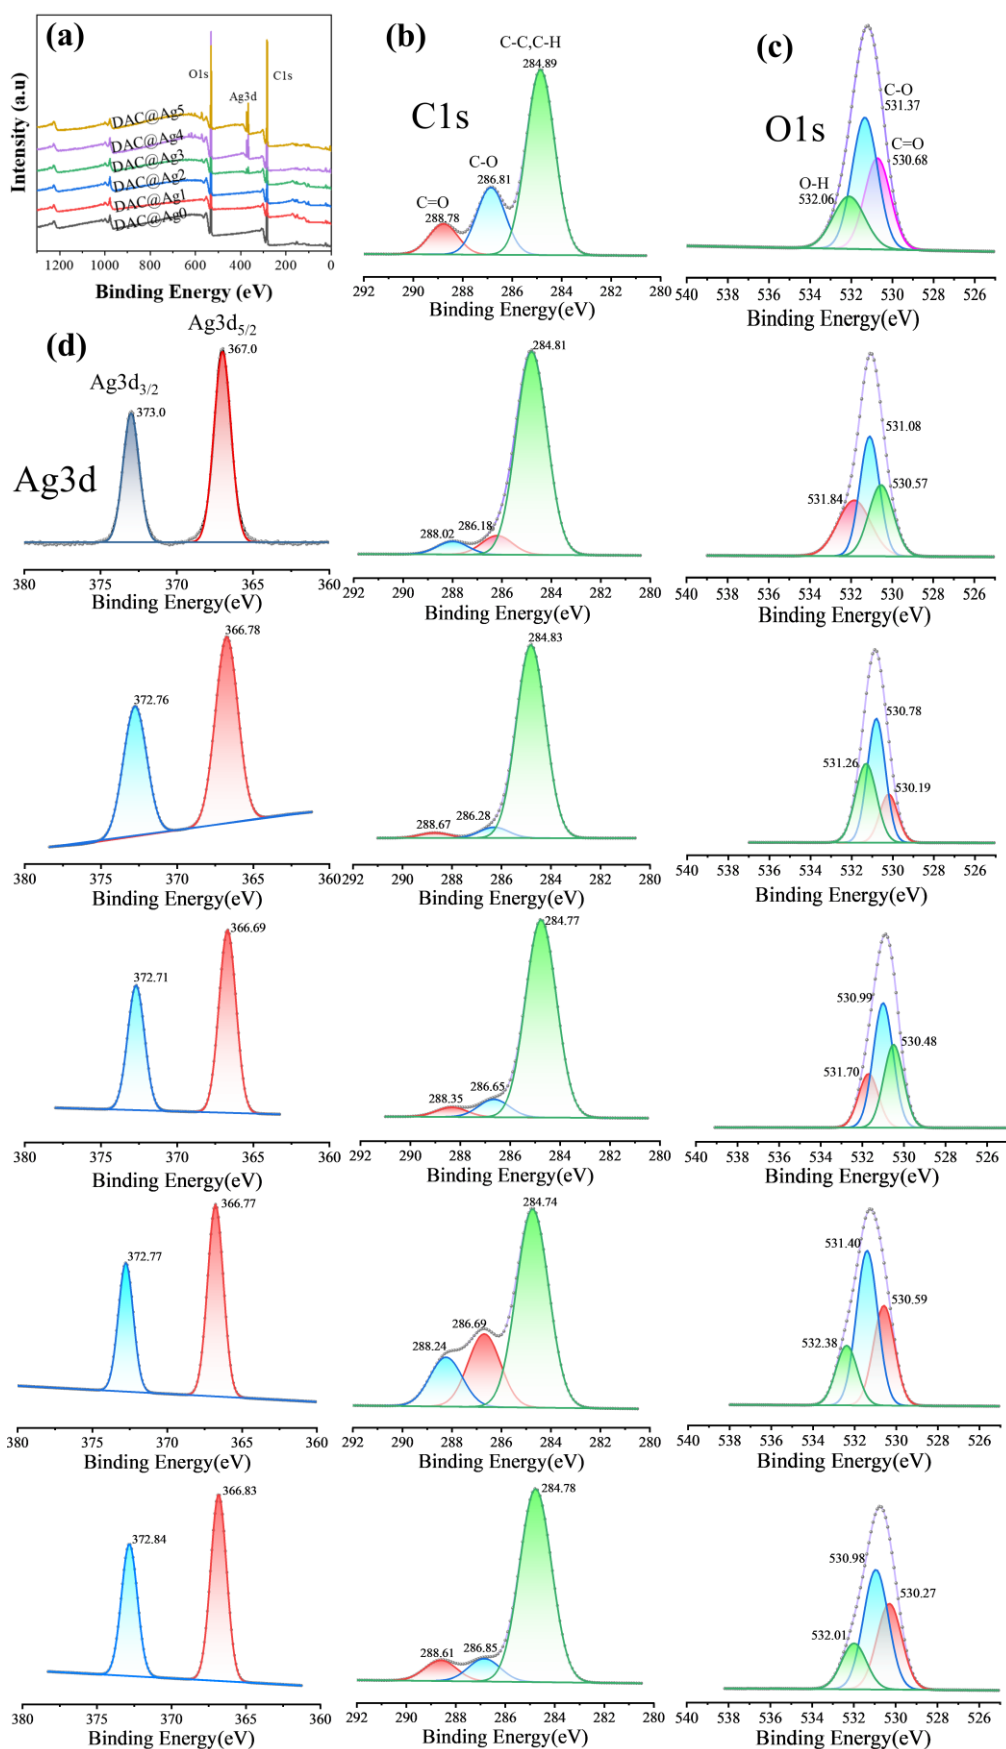

**Figure S2.** XPS spectra of DAC@Ag0-DAC@Ag5 composite films: (a) full scan spectrum, (b) C1s region, (c) O1s region and (d) Ag3d region.
